# Supplementary material for: Tutors Matter: The Relationship between Medical Students’ Satisfaction from Their Tutor and Their Overall Satisfaction from Clinical Rotations
Source: MDPI journal article supplement (doi:10.3390/ime2030012), 2023-06-22
Supplement: s1 [file s1]

**Table S1. Teaching survey.**

**It is important that your evaluation be constructive, respectful, and dignified!**

**Hospital clerkship feedback: hospital----- ward-----**

|    |                                                                                |     |      |     |   |                 |
|----|--------------------------------------------------------------------------------|-----|------|-----|---|-----------------|
| 1. | What is the number of patients you examined<br>(circle the appropriate answer) | 10< | 6-10 | 1-5 | 0 | Not<br>relevant |
|----|--------------------------------------------------------------------------------|-----|------|-----|---|-----------------|

|     | <b>To what extent are you satisfied with:</b>                                                                   | <i>To a very small extent</i><br>1 | <i>To a small extent</i><br>2 | <i>Moderately</i><br>3 | <i>To a large extent</i><br>4 | <i>To a very large extent</i><br>5 | <i>Not relevant</i><br>9 |
|-----|-----------------------------------------------------------------------------------------------------------------|------------------------------------|-------------------------------|------------------------|-------------------------------|------------------------------------|--------------------------|
| 2.  | The doctor's supervision while you performed tests                                                              |                                    |                               |                        |                               |                                    |                          |
| 3.  | The quality of the clinical discussions                                                                         |                                    |                               |                        |                               |                                    |                          |
| 4.  | Learning the use of assisting tools (imaging tests, laboratory tests, etc.)                                     |                                    |                               |                        |                               |                                    |                          |
| 5.  | The seminars in the department                                                                                  |                                    |                               |                        |                               |                                    |                          |
| 6.  | Studying procedures (for example - taking blood, transfusion)                                                   |                                    |                               |                        |                               |                                    |                          |
| 7.  | To what extent did your observations of department physicians contribute to your training to become a physician |                                    |                               |                        |                               |                                    |                          |
| 8.  | Your meetings with the department's extended staff                                                              |                                    |                               |                        |                               |                                    |                          |
| 9.  | Your interaction with the department's direction                                                                |                                    |                               |                        |                               |                                    |                          |
| 10. | <b>My total satisfaction with the rotation in its various components</b>                                        |                                    |                               |                        |                               |                                    |                          |

**Comments/clarifications (logistical, personal, and ethical aspects; physicians and nurses and other professionals who contributed to you in particular, and other)**

---
