# Supplementary material for: Tutors Matter: The Relationship between Medical Students’ Satisfaction from Their Tutor and Their Overall Satisfaction from Clinical Rotations
Source: MDPI journal article supplement (doi:10.3390/ime2030012), 2023-06-22
Supplement: s1 [file s1]

Archive with 1 entries (1 files):
- ime-2305793-supplementary.pdf
